# Supplementary material
Source: Springer Nature journal article supplement (https://www.springermedizin.de/resource/supplementary/13098_2009_17_MOESM4_ESM.pdf/9670332)

**Food consumption  
(g/day/rat)**

- H.F.D
- L.carnitine
- ▲ Herbal extract

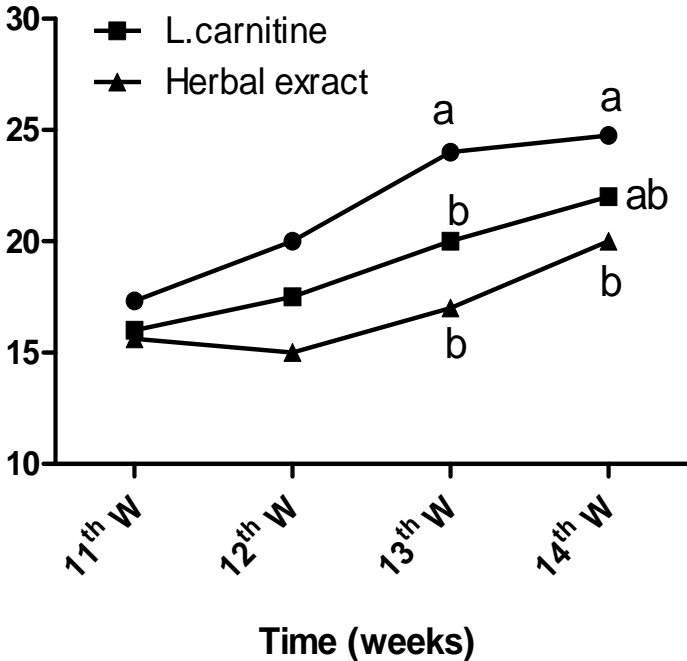

Supplement: MOESM4 [file 9670332]
